# Supplementary material for: Inefficient Nef-Mediated Downmodulation of CD3 and MHC-I Correlates with Loss of CD4+ T Cells in Natural SIV Infection
Source: PubMed Central journal article supplement (PMC2444047; doi:10.1371/journal.ppat.1000107), 2008-07-18
Supplement: ppat.1000107.s008.pdf [file ppat.1000107.s008.pdf]

**Table S1. Functional activity of primary SIVsmm Nef alleles tested in bulk**

| SM  | CD4+ T cell    | GenBank            | down-modulation (n-fold) of: |     |      |       |       | Infectivity (%)  |                  | NFAT-dep.        |
|-----|----------------|--------------------|------------------------------|-----|------|-------|-------|------------------|------------------|------------------|
|     | count/ $\mu$ l | Accession numbers  | CD4                          | CD3 | CD28 | MHC-I | CXCR4 | P4-CCR5          | TZM-bl           | Luc activity (%) |
| FNp | 1400           | DQ408682, DQ408683 | 2,3                          | 3,9 | 1,8  | 2,3   | 1,5   | 45,3 $\pm$ 4,0   | 51,3 $\pm$ 4,6   | 36,3 $\pm$ 3,3   |
| FZs | 1291           | DQ408716, DQ408717 | 1,7                          | 3,0 | 1,4  | 2,3   | 1,0   | 74,8 $\pm$ 14,3  | 90,5 $\pm$ 9,8   | 18,2 $\pm$ 2,8   |
| FWk | 1275           | DQ408718, DQ408719 | 3,7                          | 2,8 | 2,2  | 2,9   | 1,9   | 71,4 $\pm$ 12,8  | 111,7 $\pm$ 3,8  | 60,0 $\pm$ 3,2   |
| FTn | 1210           | DQ408714, DQ408715 | 2,0                          | 2,4 | 1,5  | 2,6   | 1,9   | 61,6 $\pm$ 18,3  | 86,7 $\pm$ 1,6   | 20,0 $\pm$ 4,1   |
| FNt | 1100           | DQ408712, DQ408713 | 4,7                          | 5,3 | 1,8  | 2,8   | 1,6   | 91,6 $\pm$ 10,7  | 132,0 $\pm$ 9,9  | 27,0 $\pm$ 3,7   |
| FJj | 1073           | EU636911, EU636912 | 2,0                          | 4,5 | 1,9  | 2,6   | 1,2   | 15,6 $\pm$ 4,0   | 8,1 $\pm$ 0,8    | 31,8 $\pm$ 9,0   |
| FHr | 941            | DQ408710, DQ408711 | 2,5                          | 3,5 | 1,6  | 3,2   | 1,2   | 57,8 $\pm$ 4,9   | 86,2 $\pm$ 3,8   | 26,7 $\pm$ 8,5   |
| FCs | 917            | EU636913, EU636914 | 2,6                          | 5,1 | 1,8  | 2,7   | 1,3   | 108,3 $\pm$ 20,7 | 110,4 $\pm$ 24,9 | 33,3 $\pm$ 0,3   |
| FJn | 663            | DQ408702, DQ408703 | 4,0                          | 4,5 | 2,1  | 3,5   | 1,4   | 104,3 $\pm$ 17,5 | 121,4 $\pm$ 9,6  | 28,3 $\pm$ 0,3   |
| FAi | 564            | DQ408720, DQ408721 | 3,8                          | 4,8 | 1,9  | 3,1   | 1,9   | 222,8 $\pm$ 24,3 | 191,1 $\pm$ 47,9 | 48,8 $\pm$ 4,1   |
| FKl | 520            | DQ408722, DQ408723 | 2,0                          | 4,0 | 1,8  | 2,7   | 1,6   | 36,7 $\pm$ 4,0   | 74,9 $\pm$ 16,7  | 36,8 $\pm$ 4,2   |
| FEm | 486            | DQ408688, DQ408689 | 2,1                          | 2,9 | 2,4  | 2,9   | 1,3   | 62,6 $\pm$ 7,6   | 57,1 $\pm$ 4,3   | 33,3 $\pm$ 3,5   |
| FFv | 468            | DQ408698, DQ408699 | 1,1                          | 1,8 | 1,3  | 2,2   | 0,6   | 10,5 $\pm$ 0,6   | 18,1 $\pm$ 4,2   | 40,7 $\pm$ 7,1   |
| FIg | 450            | DQ408700, DQ408701 | 1,0                          | 2,1 | 1,9  | 2,3   | 1,7   | 83,8 $\pm$ 8,3   | 82,4 $\pm$ 7,0   | 59,0 $\pm$ 11,8  |
| FBn | 431            | DQ408696, DQ408697 | 2,2                          | 2,2 | 1,4  | 2,4   | 1,2   | 31,7 $\pm$ 5,5   | 31,2 $\pm$ 8,7   | 54,2 $\pm$ 6,6   |
| FJo | 380            | DQ408704, DQ408705 | 2,5                          | 3,1 | 1,7  | 2,5   | 1,6   | 68,4 $\pm$ 11,1  | 105,3 $\pm$ 14,4 | 56,1 $\pm$ 5,2   |
| FCq | 379            | DQ408724, DQ408725 | 3,3                          | 3,8 | 1,6  | 2,0   | 1,2   | 29,6 $\pm$ 0,5   | 32,0 $\pm$ 1,0   | 69,2 $\pm$ 3,8   |
| FNg | 363            | DQ408686, DQ408687 | 1,5                          | 2,1 | 1,6  | 2,0   | 0,7   | 29,6 $\pm$ 2,7   | 71,3 $\pm$ 12,9  | 50,8 $\pm$ 5,7   |
| FDn | 357            | DQ408684, DQ408685 | 2,2                          | 3,1 | 1,5  | 1,9   | 1,0   | 37,2 $\pm$ 5,8   | 62,1 $\pm$ 7,7   | 47,3 $\pm$ 3,5   |
| FPm | 351            | DQ408706, DQ408707 | 3,6                          | 3,4 | 2,1  | 2,6   | 1,4   | 75,0 $\pm$ 0,2   | 145,5 $\pm$ 42,4 | 53,2 $\pm$ 5,6   |
| FFj | 218            | DQ408690, DQ408691 | 1,8                          | 1,7 | 1,3  | 2,1   | 1,1   | 36,3 $\pm$ 5,7   | 75,8 $\pm$ 6,0   | 37,0 $\pm$ 12,1  |
| FAn | 200            | EU636909, EU636910 | 2,2                          | 3,5 | 2,4  | 2,2   | 1,1   | 58,8 $\pm$ 10,2  | 90,0 $\pm$ 4,1   | 45,2 $\pm$ 11,3  |
| FRg | 20             | EU636907, EU636908 | 1,1                          | 1,8 | 1,0  | 1,5   | 1,0   | 37,6 $\pm$ 11,7  | 66,8 $\pm$ 7,5   | 32,7 $\pm$ 7,3   |
| FFr | 7              | DQ408694, DQ408695 | 1,6                          | 2,1 | 1,5  | 1,7   | 1,3   | 93,5 $\pm$ 11,7  | 120,7 $\pm$ 5,1  | 48,5 $\pm$ 8,0   |
| FBr | 5              | DQ408692, DQ408693 | 1,6                          | 1,4 | 1,9  | 2,5   | 2,1   | 6,9 $\pm$ 1,6    | 24,6 $\pm$ 5,5   | 48,5 $\pm$ 13,6  |
| FYb | 3              | DQ408708, DQ408709 | 3,0                          | 1,2 | 1,1  | 2,2   | 0,8   | 55,1 $\pm$ 16,9  | 67,7 $\pm$ 15,7  | 239,2 $\pm$ 13,9 |
