# Supplementary material for: Inefficient Nef-Mediated Downmodulation of CD3 and MHC-I Correlates with Loss of CD4+ T Cells in Natural SIV Infection
Source: PubMed Central journal article supplement (PMC2444047; doi:10.1371/journal.ppat.1000107), 2008-07-18
Supplement: ppat.1000107.s009.pdf [file ppat.1000107.s009.pdf]

**Table S2. Functional activity of primary and synthetic mutant SIVsmm *nef* alleles**

| Allele       | GenBank     |                  | downmodulation (n-fold) |     |      |       | expression (%) |       |               | NFAT-dep.        |
|--------------|-------------|------------------|-------------------------|-----|------|-------|----------------|-------|---------------|------------------|
|              | Accession # | Remark           | CD4                     | CD3 | CD28 | MHC-I | CD69           | IL-2R | Apoptosis (%) | Luc activity (%) |
| NL4-3        | M19921      | Control G1       | 2,6                     | 1,0 | 1,8  | 2,5   | 94,4           | 77,8  | 151,3         | 397,8±97,9       |
| mac239       | M33262      | Control G2       | 2,6                     | 5,7 | 5,7  | 3,3   | 10,1           | 52,4  | 57,2          | 23,2±4,7         |
| SMhi         | EU636915    | Synthetic allele | 2,5                     | 6,1 | 4,8  | 3,9   | 8,6            | 43,3  | 53,4          | 33,0±4,7         |
| SMlow        | EU636916    | Synthetic allele | 2,5                     | 4,5 | 4,1  | 3,1   | 14,1           | 60,3  | 64,2          | 71,8±3,7         |
| FCs clone 1  | EU636913    | Primary allele   | 2,2                     | 4,2 | 2,1  | 2,4   | 24,0           | 62,3  | 85,6          | 57,3±7,7         |
| FCs cl.1mut  | EU636917    | Synthetic allele | 1,4                     | 1,0 | 1,3  | 1,2   | 92,3           | 90,0  | 112,9         | 737,6±30,8       |
| FYb clone 17 | EU636918    | Primary allele   | 1,5                     | 1,6 | 1,4  | 2,3   | 59,0           | 77,3  | 157,0         | 560,8±60,7       |
| FYb cl.17mut | EU636919    | Synthetic allele | 1,3                     | 2,9 | 2,1  | 2,4   | 20,2           | 63,1  | 65,4          | 64,0±9,6         |
| FBr clone 6  | EU636920    | Primary allele   | 2,3                     | 5,8 | 11,9 | 4,0   | 15,5           | 36,1  | 53,5          | 62,1±6,3         |
| FBr clone 8  | EU636921    | Primary allele   | 2,5                     | 1,1 | 3,1  | 2,6   | 112,1          | 80,1  | 85,0          | 175,7±15,6       |
| FBr clone 9  | EU636922    | Primary allele   | 2,1                     | 5,9 | 1,9  | 1,6   | 36,7           | 57,4  | n.d.          | 44,7±1,6         |
| FBr clone 10 | EU636923    | Primary allele   | 2,7                     | 5,6 | 7,9  | 1,6   | 49,4           | 47,3  | n.d.          | 44,8±3,3         |
